# Supplementary material for: Thermal oxidative etching method derived graphitic C3N4: highly efficient metal-free catalyst in the selective epoxidation of styrene
Source: Royal Society of Chemistry journal article supplement (doi:10.1039/c6ra26137j), 2017-01-01
Supplement: c6ra26137j1.pdf [file c6ra26137j1.pdf]

## Electronic Supplementary Information

### Thermal Oxidative Etching Method Derived Graphitic C<sub>3</sub>N<sub>4</sub>: Highly Efficient Metal-free Catalyst in the Selective Epoxidation of Styrene

Jia Ren<sup>a†</sup>, Xin Liu<sup>a†</sup>, Lu Zhang<sup>a</sup>, Qianqian Liu<sup>a</sup>, Ruihua Gao<sup>b\*</sup>, Wei-Lin Dai<sup>a\*</sup>

<sup>a</sup> Department of chemistry & Shanghai key laboratory of molecular catalysis and innovative material, Fudan University, Shanghai 200433, P. R. China;

<sup>b</sup> State Key Laboratory of Molecular Engineering of Polymers, Department of Macromolecular Science, Fudan University, Shanghai, 200433, P. R. China

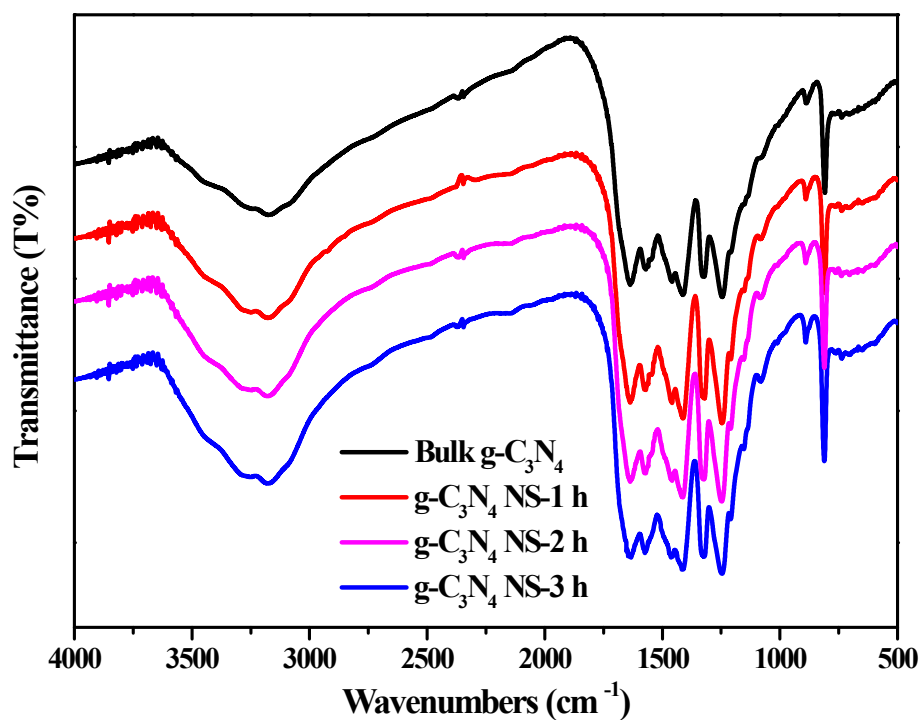

**Fig.S1** FTIR spectra of bulk g-C<sub>3</sub>N<sub>4</sub>, g-C<sub>3</sub>N<sub>4</sub> NS-1 h, g-C<sub>3</sub>N<sub>4</sub> NS-2 h, and g-C<sub>3</sub>N<sub>4</sub> NS-3 h, respectively.

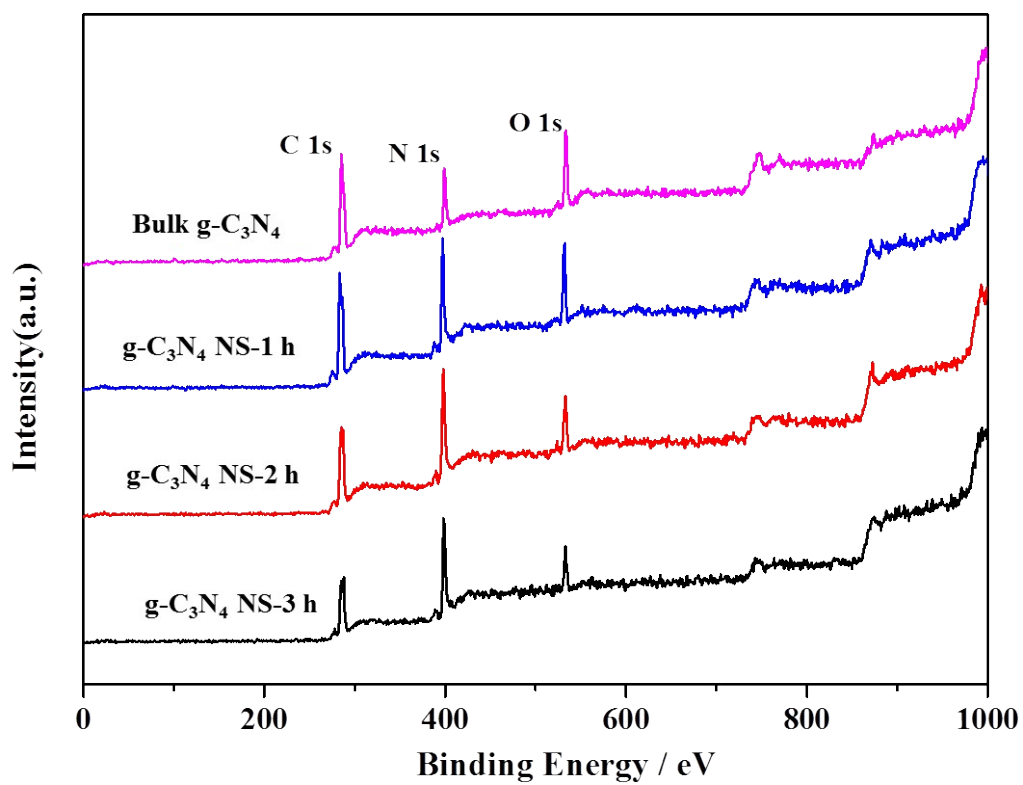

**Fig. S2** XPS spectra of samples: survey spectra (a), C 1s spectra (b).

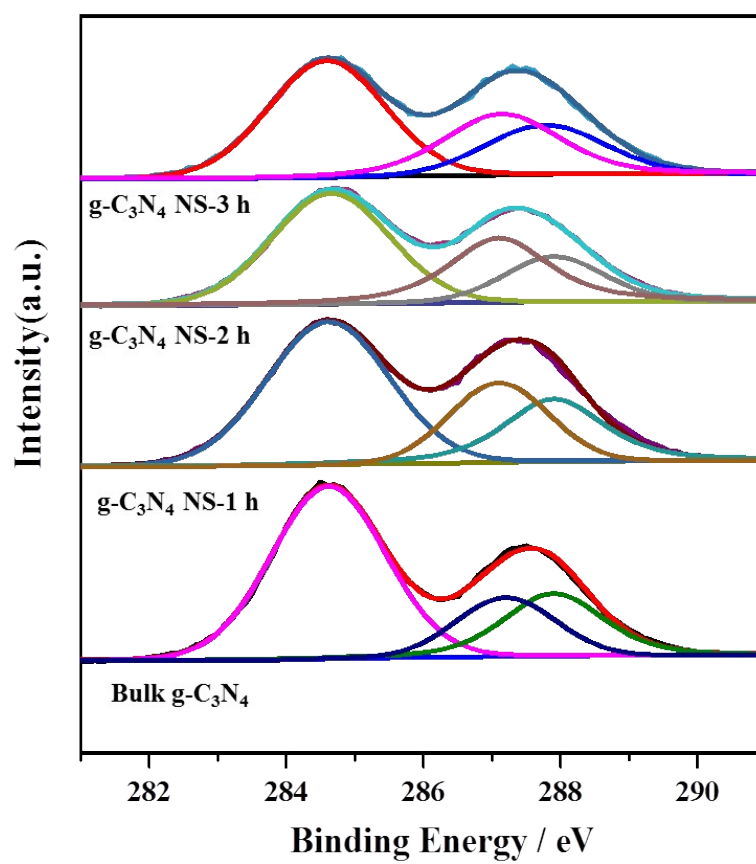

**Fig. S3** the XPS C 1s peaks of sample.

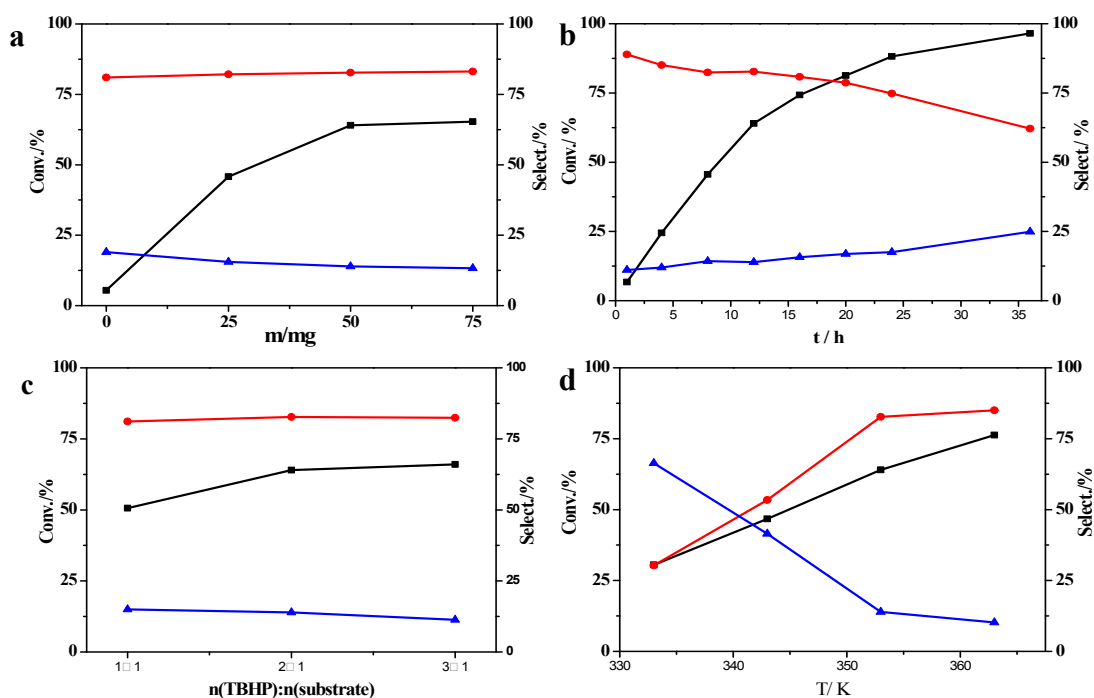

**Fig.S4** Catalytic activity and selectivity of g-C<sub>3</sub>N<sub>4</sub> NS-2 h on the epoxidation of styrene under different conditions. (a) Effect of the amount of catalyst, 8.7 mmol TBHP (70% aqueous solution) T= 353 K, t=12 h; (b) Effect of the reaction time, catalyst 50 mg, 8.7 mmol TBHP (70% aqueous solution) T= 353 K; (c) Effect of TBHP/styrene molar ratio, catalyst 50 mg, T= 353 K, t=12 h; (d) Effect of reaction temperature, catalyst 50 mg, 8.7 mmol TBHP (70% aqueous solution), t=12 h. Reaction condition: 4.35 mmol styrene, solvent (CH<sub>3</sub>CN) = 5 mL. Symbols: black square, conversion of styrene; red dot, selectivity to epoxidation; blue triangle, selectivity to benzaldehyde.

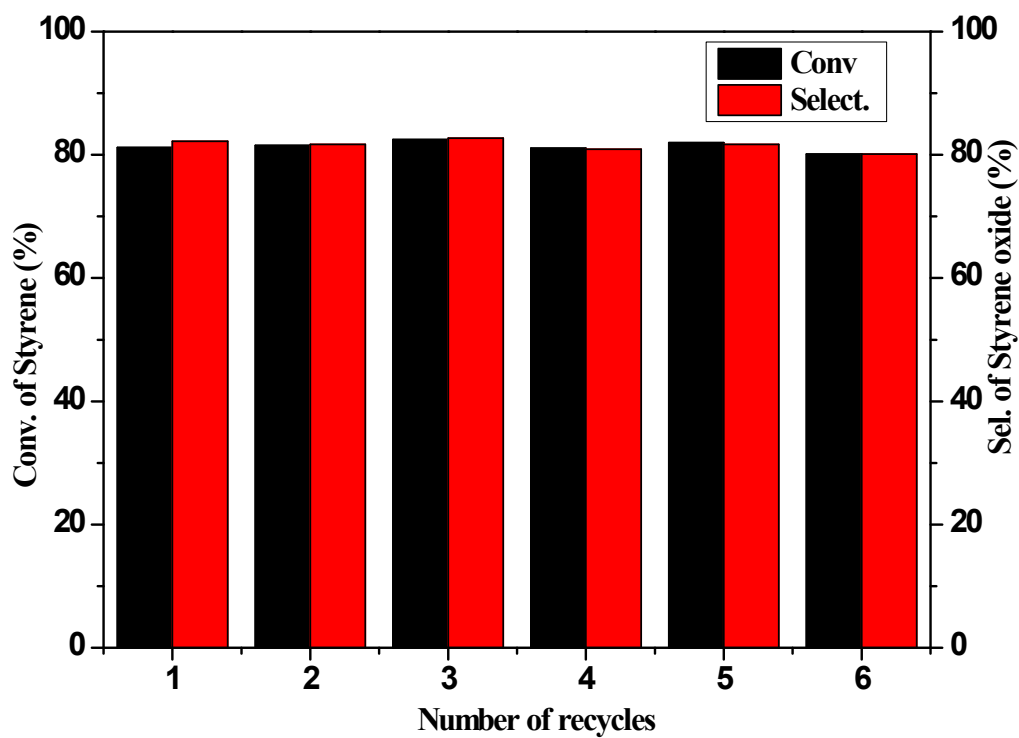

**Fig.S5** Recyclability test of g-C<sub>3</sub>N<sub>4</sub> NS-3h nanorods for epoxidation of styrene.

<sup>a</sup>Reaction conditions: 50 mg g-C<sub>3</sub>N<sub>4</sub> NS-3h catalyst, 4.35 mmol styrene, 8.7 mmol TBHP (70% aqueous solution), solvent (CH<sub>3</sub>CN) = 5 mL, reaction temperature 353 K, t=12h.

**Table S1** BET surface areas and pore volume of the sample.

| Entry | Catalyst                               | S <sub>BET</sub> (m <sup>2</sup> g <sup>-1</sup> ) | pore volume (cm <sup>3</sup> g <sup>-1</sup> ) |
|-------|----------------------------------------|----------------------------------------------------|------------------------------------------------|
| 1     | Bulk g-C <sub>3</sub> N <sub>4</sub>   | 22                                                 | 0.176                                          |
| 2     | g-C <sub>3</sub> N <sub>4</sub> NS-1 h | 52                                                 | 0.304                                          |
| 3     | g-C <sub>3</sub> N <sub>4</sub> NS-2 h | 151                                                | 0.816                                          |
| 4     | g-C <sub>3</sub> N <sub>4</sub> NS-3 h | 245                                                | 1.619                                          |
